# Supplementary material for: Immunization of pigs with replication-incompetent adenovirus-vectored African swine fever virus multi-antigens induced humoral immune responses but no protection following contact challenge
Source: PubMed Central journal article supplement (PMC10316028; doi:10.3389/fvets.2023.1208275), 2023-06-19
Supplement: Data_Sheet_1.pdf [file Data_Sheet_1.pdf]

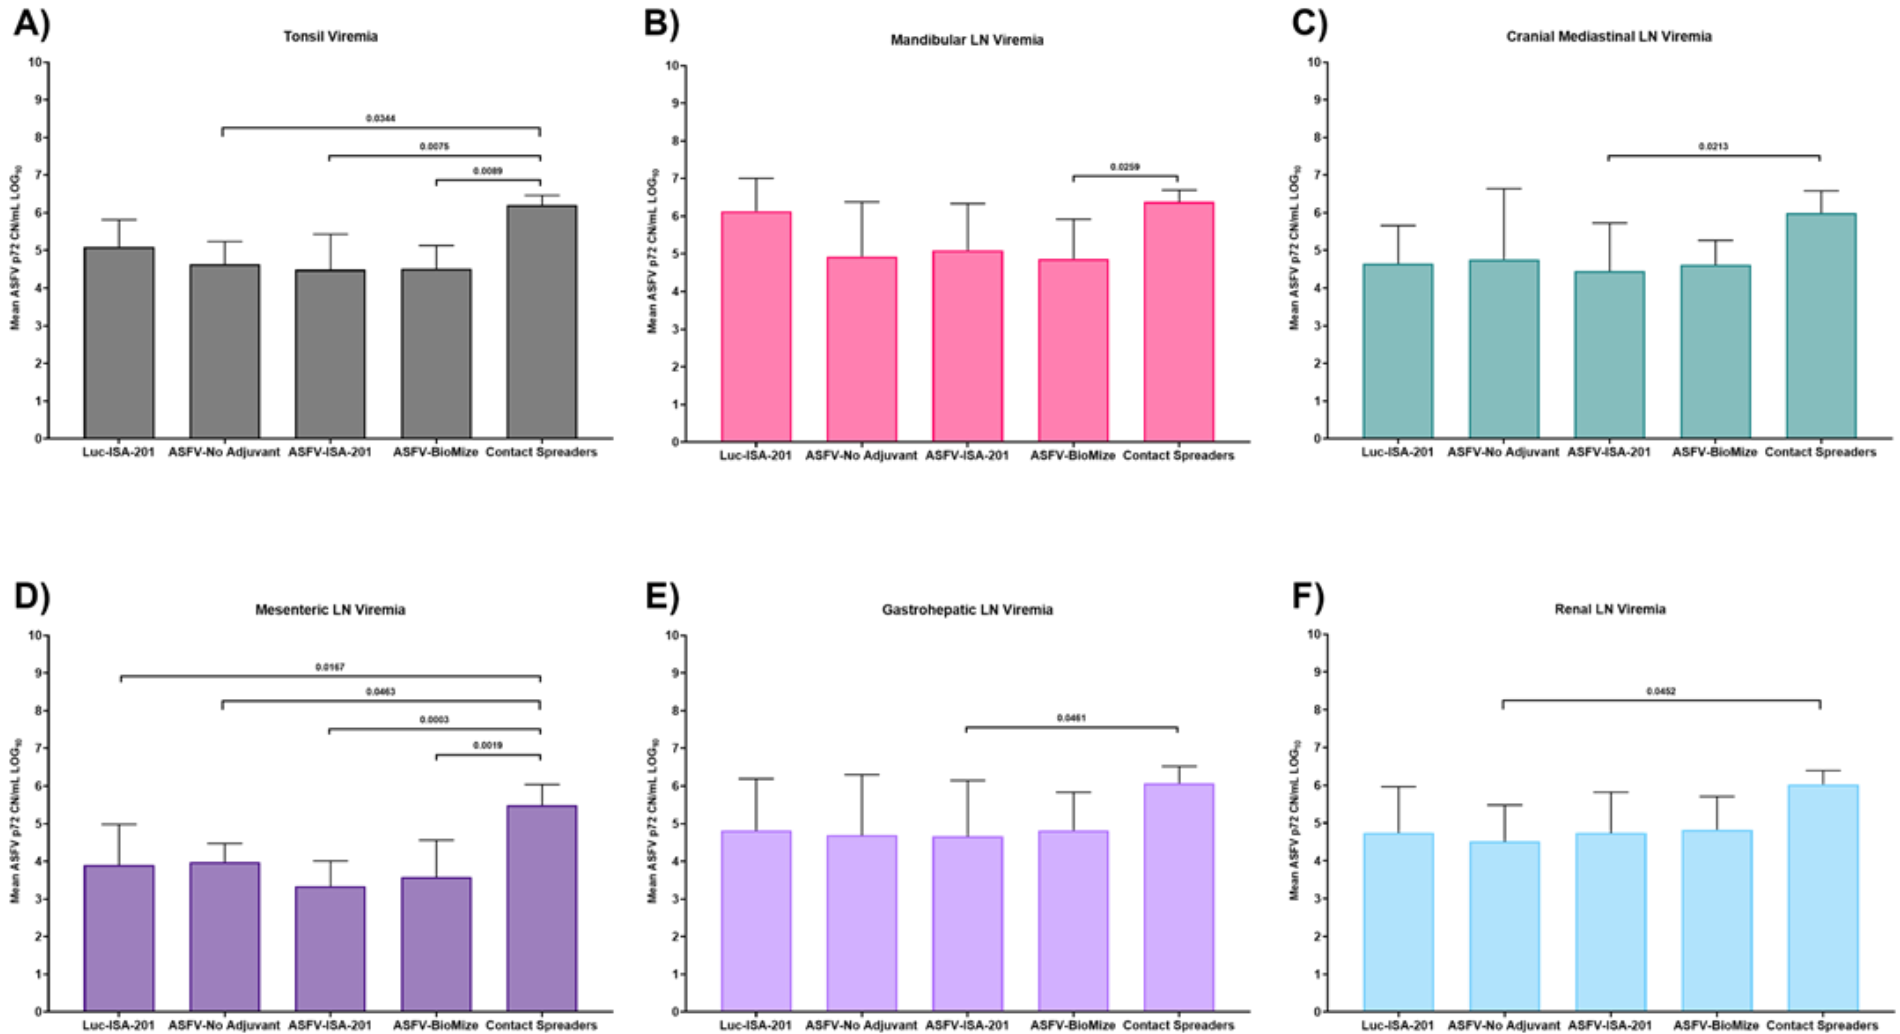

**Supplementary Figure 1. Viremia in infected lymphoid tissue.** Tissue CN/mL was quantified by qPCR from the samples collected on the day of euthanasia for the vaccinees and Contact Spreaders for (A) tonsil, (B) mandibular LN, (C) cranial mediastinal LN, (D) mesenteric LN, (E) gastrohepatic LN, and (F) the renal LN. Each plotted value represents the mean for each tissue per group. The Log base 10 was calculated for each mean CN/mL and plotted as supplementary to the Figure 9 stacked bar graph. Total mean ASFV p72 genomic DNA was statistically significant between the groups as denoted by the p-value indicated on each graph, any groups not denoted were not statistically significant.

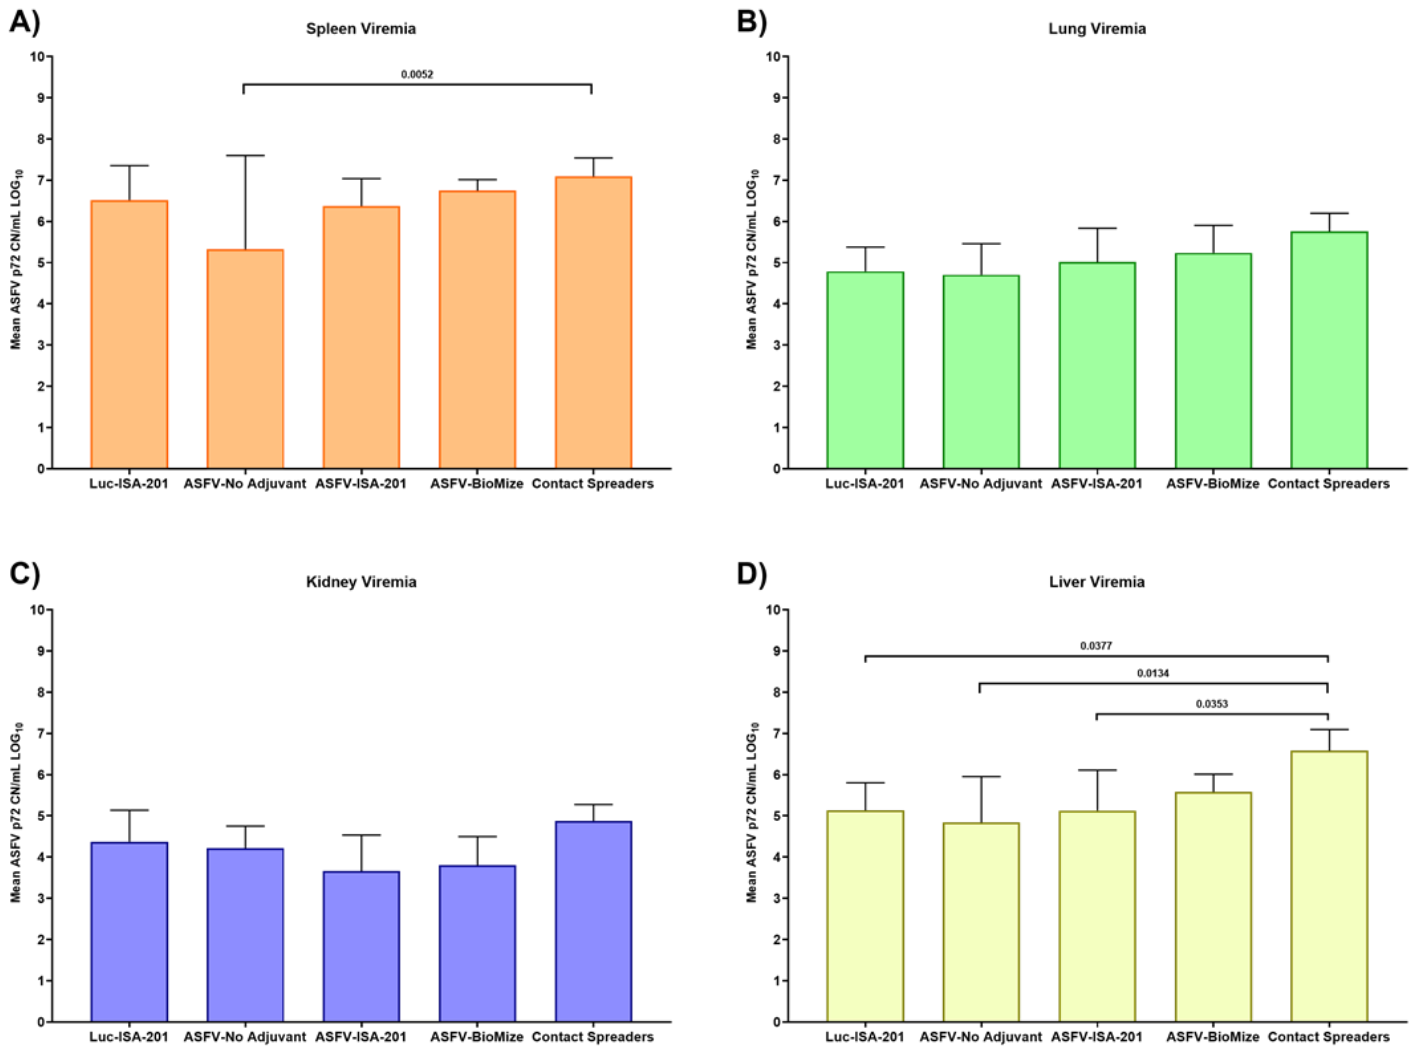

**Supplementary Figure 2. Viremia in infected visceral tissue.** Tissue CN/mL was quantified by qPCR from the samples collected on the day of euthanasia for the vaccinees and Contact Spreaders for (A) the spleen, (B) the lung, (C) the kidney, and (D) the liver. Each plotted value represents the mean for each tissue per group. The Log base 10 was calculated for each mean CN/mL and plotted as supplementary to the Figure 9 stacked bar graph. Total mean ASFV p72 genomic DNA was statistically significant between the groups as denoted by the p-value indicated in (A) and (D), any groups not denoted were not statistically significant.

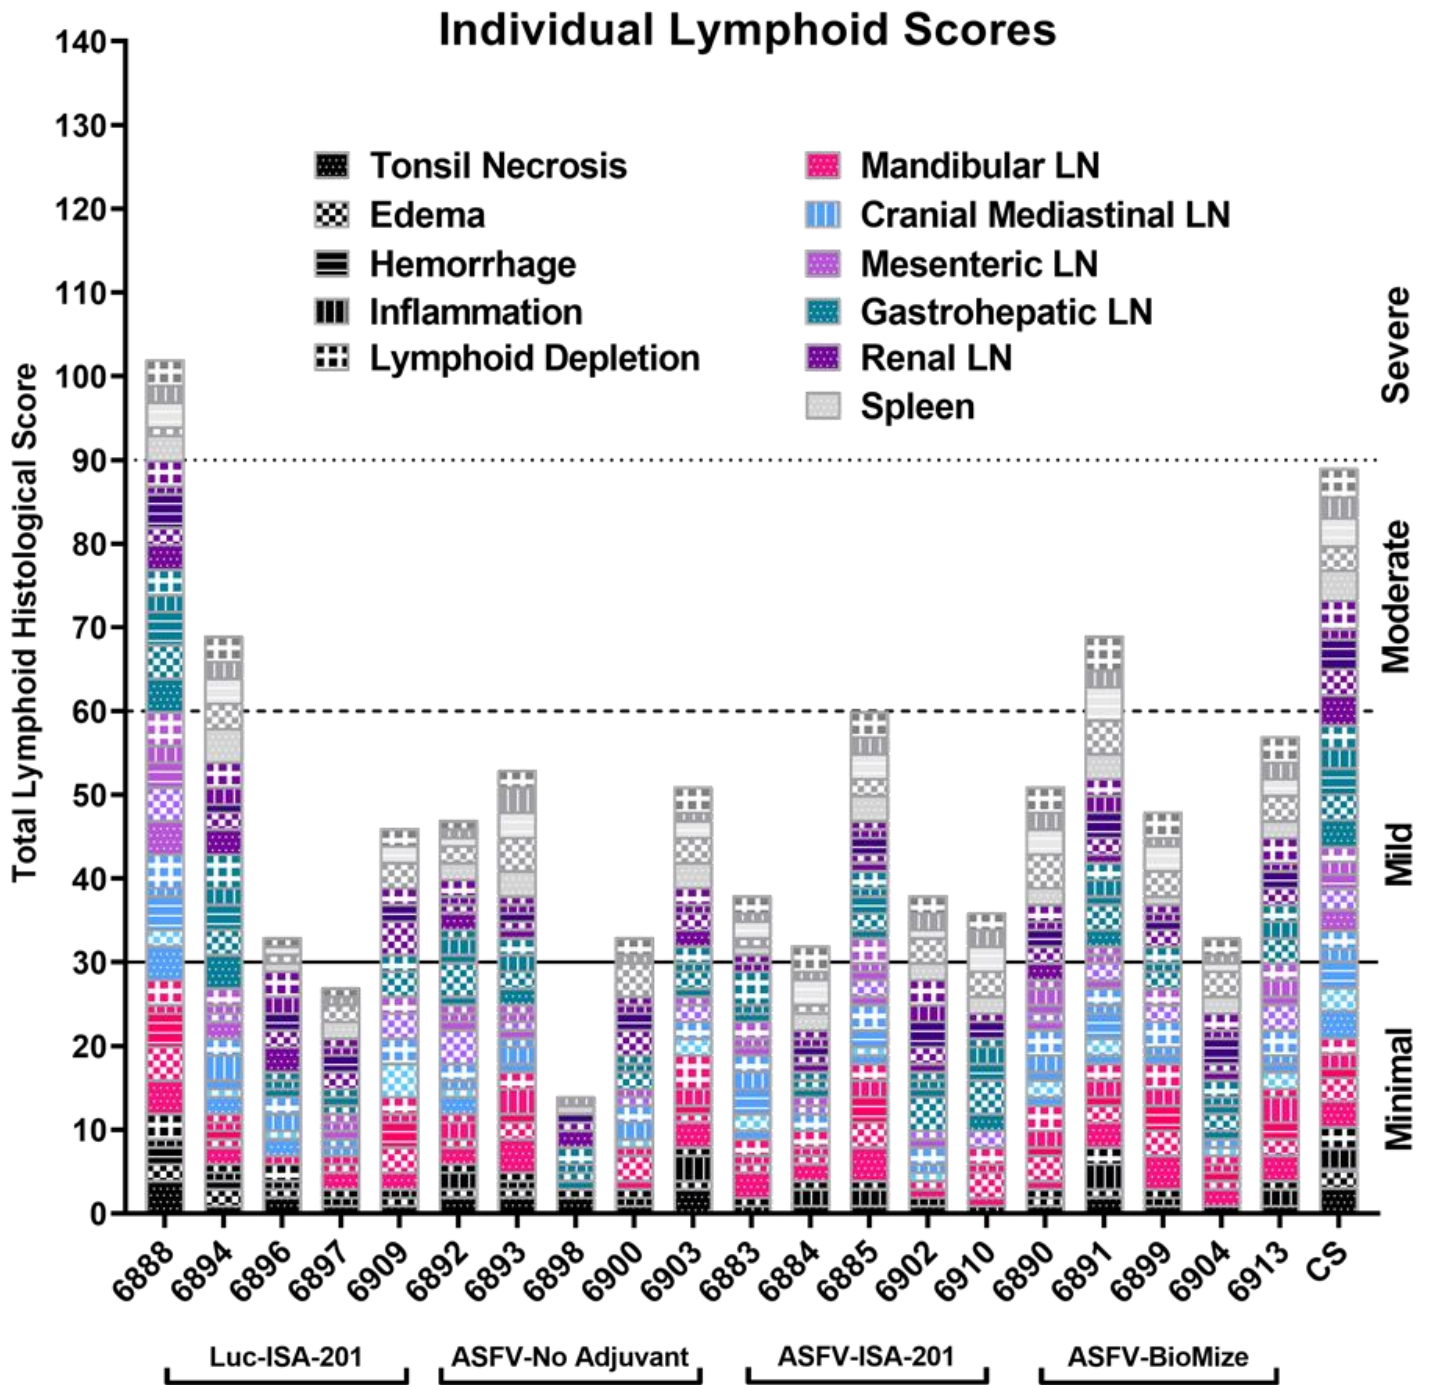

**Supplementary Figure 3. Lymphoid tissue histopathology.** Individual lymphoid tissue histological scores for each pig in the treatment and control groups, whereas the Contact Spreaders (CS) are plotted as group mean. Histological scores are stacked and reflected as the overall total per animal.

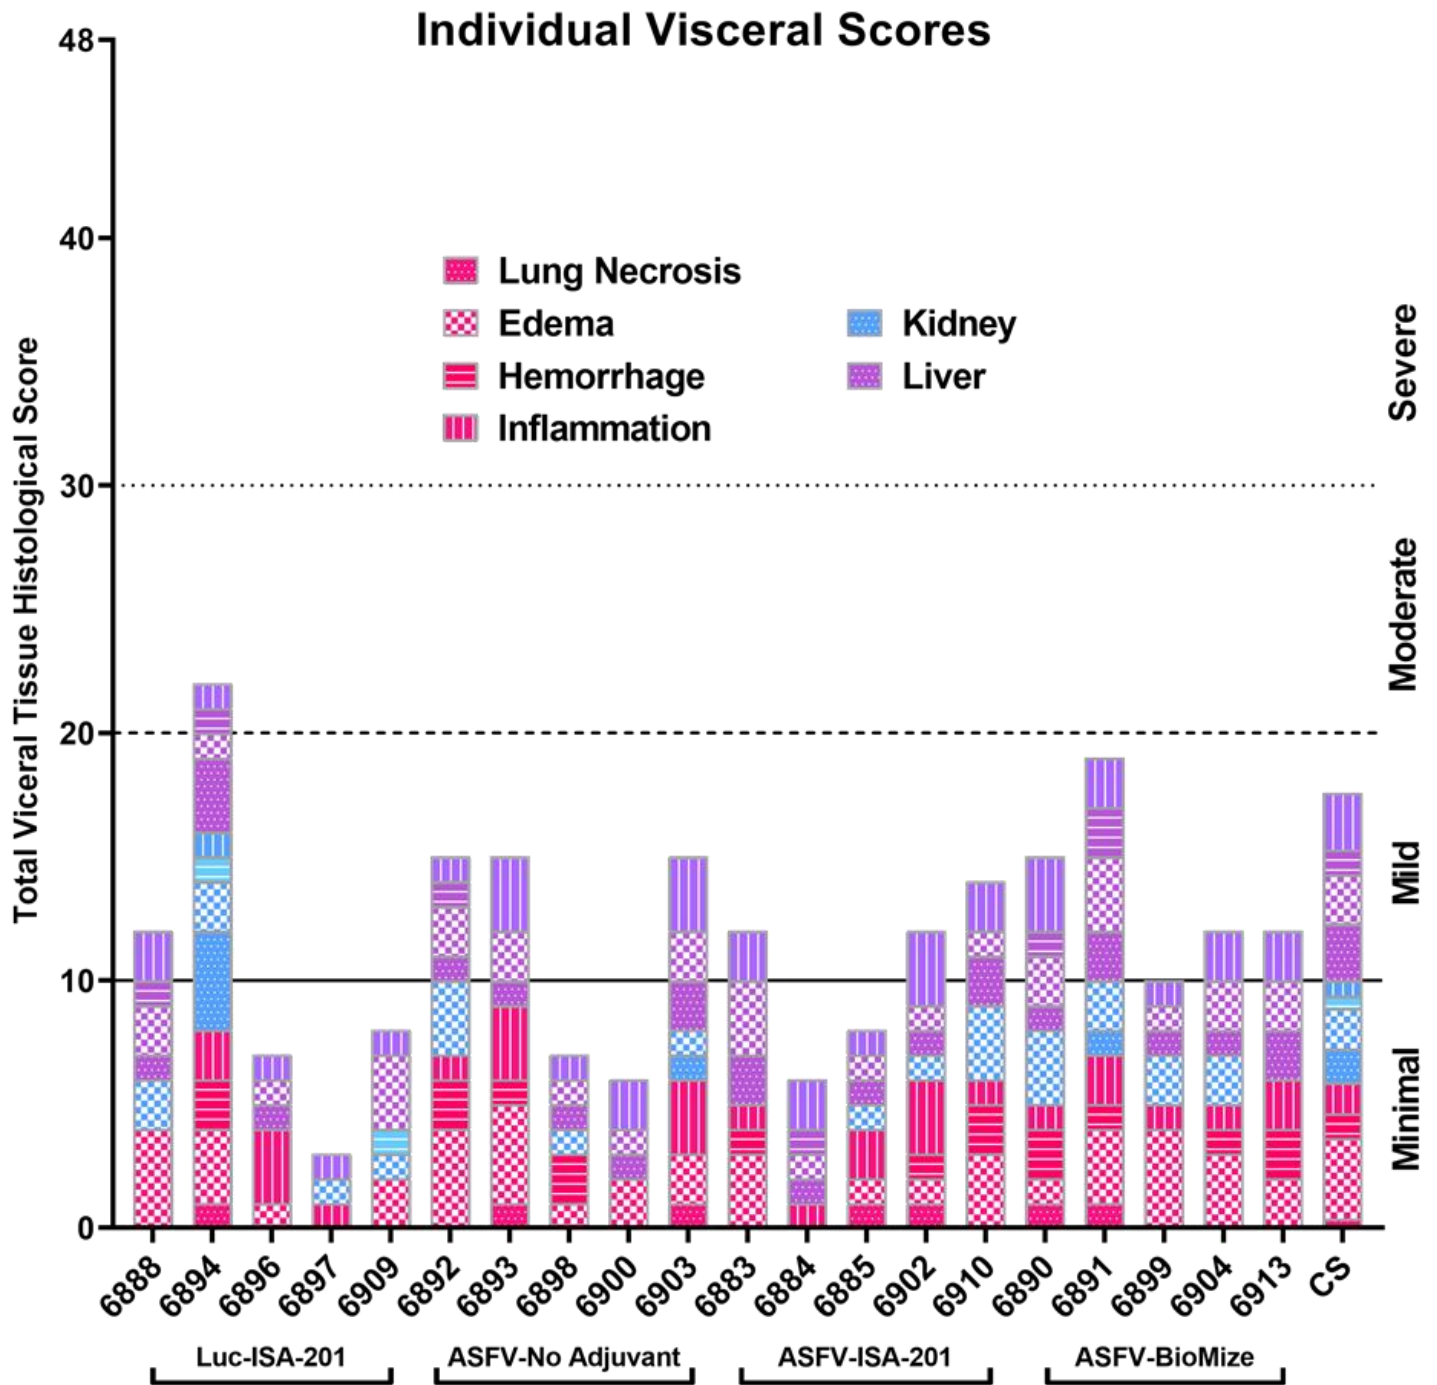

**Supplementary Figure 4. Visceral tissue histopathology.** Individual visceral tissue histological scores for each pig in the treatment and control groups, whereas the Contact Spreaders (CS) are plotted as group mean. Histological scores are stacked and reflected as the overall total per animal.

**Supplementary Table 1. ASFV Antigen expression.**

|                                             | <b>Construct</b>                   | <b>% Positive cells</b> |
|---------------------------------------------|------------------------------------|-------------------------|
|                                             | <b>None (negative control)</b>     | <b>0.07</b>             |
|                                             | <b>Ad5-pp62 (positive control)</b> | <b>2.97</b>             |
| <b>Low ASFV antigen<br/>Expression</b>      | <b>Ad5-05</b>                      | <b>0.53</b>             |
|                                             | <b>Ad5-13</b>                      | <b>0.75</b>             |
|                                             | <b>Ad5-34</b>                      | <b>1.53</b>             |
|                                             | <b>Ad5-03</b>                      | <b>1.71</b>             |
|                                             | <b>Ad5-01</b>                      | <b>1.92</b>             |
|                                             |                                    |                         |
| <b>Medium ASFV antigen<br/>Expression</b>   | <b>Ad5-04</b>                      | <b>2.38</b>             |
|                                             | <b>Ad5-29</b>                      | <b>2.87</b>             |
|                                             | <b>Ad5-11</b>                      | <b>3.08</b>             |
|                                             | <b>Ad5-10</b>                      | <b>3.14</b>             |
|                                             | <b>Ad5-18</b>                      | <b>3.29</b>             |
|                                             | <b>Ad5-39</b>                      | <b>3.44</b>             |
| <b>High ASFV<br/>antigen<br/>Expression</b> | <b>Ad5-21</b>                      | <b>4.55</b>             |
|                                             | <b>Ad5-09</b>                      | <b>7.78</b>             |
|                                             | <b>Ad5-19</b>                      | <b>8.92</b>             |

Values are expressed as a percent of the total parental cell population as measured using ASFV convalescent serum by the Ad5-ASFV constructs using flow cytometric analyses.

**Supplementary Table 2. Clinical Score Rubric.**

| <b>Parameter</b>                                                               | <b>Score</b> | <b>Description</b>                                                |
|--------------------------------------------------------------------------------|--------------|-------------------------------------------------------------------|
| Breathing                                                                      | 0            | Normal breathing, no coughing/sneezing                            |
|                                                                                | 1            | Slightly labored breathing, mild coughing/sneezing                |
|                                                                                | 2            | Labored, increased rate, moderate coughing/sneezing               |
|                                                                                | 3            | Highly labored, rapid rate, frequent coughing/sneezing            |
| Liveliness                                                                     | 0            | Attentive (curious, stands up immediately)                        |
|                                                                                | 1            | Slightly reduced (stands up hesitantly but without help)          |
|                                                                                | 2            | Tired, get up only when forced to, lies down again                |
|                                                                                | 3            | Dormant, will not stand up                                        |
| Walking                                                                        | 0            | Well-coordinated movements                                        |
|                                                                                | 1            | Stiffness while standing up, afterward normal                     |
|                                                                                | 2            | Distinct lameness, able to walk                                   |
|                                                                                | 3            | Massive lameness, unable to walk                                  |
| Skin                                                                           | 0            | Evenly light pink, flat hair coat                                 |
|                                                                                | 1            | Reddened skin areas                                               |
|                                                                                | 2            | Purple/blue discolored areas (ears, legs)                         |
|                                                                                | 3            | Black-red discoloration of the skin                               |
| Eyes/conjunctiva                                                               | 0            | Light pink                                                        |
|                                                                                | 1            | Reddened, clear secretion                                         |
|                                                                                | 2            | Highly inflamed, turbid secretion                                 |
|                                                                                | 3            | Highly inflamed, secretions prevent eyes from opening             |
| Body Condition<br>[detection of ribs, back bones,<br>hip bones, and pin bones] | 0            | Ideal, smooth, and rounded with an even feel                      |
|                                                                                | 1            | Mildly Thin, easy to feel with pressure                           |
|                                                                                | 2            | Moderately Thin, easy to feel with pressure, and beginning to see |
|                                                                                | 3            | Emaciated, obvious/easy to see                                    |
| Feces                                                                          | 0            | normal                                                            |
|                                                                                | 1            | None                                                              |
|                                                                                | 2            | Diarrhea                                                          |
|                                                                                | 3            | Mucus or bloody diarrhea                                          |

Maximum score: 21

**Supplementary Table 3. Average ASFV tissue viremia per group compared to surviving pig (CN/mL).**

| <b>Groups</b>     | <b>Tonsil</b> | <b>Mandibular LN</b> | <b>Cranial Mediastinal LN</b> | <b>Mesenteric LN</b> | <b>Gastrohepatic LN</b> | <b>Renal LN</b> | <b>Spleen</b> | <b>Lung</b> | <b>Kidney</b> | <b>Liver</b> |
|-------------------|---------------|----------------------|-------------------------------|----------------------|-------------------------|-----------------|---------------|-------------|---------------|--------------|
| Survivor          | 3.9E+02       | 2.2E+03              | 7.7E+04                       | 2.9E+03              | 3.9E+03                 | 5.7E+02         | 2.0E+04       | 3.6E+03     | 9.5E+05       | 1.1E+04      |
| Luc-ISA-201       | 3.3E+05       | 5.9E+06              | 2.0E+05                       | 4.9E+04              | 5.2E+05                 | 2.7E+05         | 1.1E+07       | 1.2E+05     | 4.6E+04       | 3.4E+05      |
| ASFV-No Adjuvant  | 9.1E+04       | 3.6E+05              | 1.2E+07                       | 1.5E+04              | 1.4E+06                 | 1.2E+05         | 9.6E+06       | 9.4E+04     | 2.7E+04       | 3.9E+05      |
| ASFV-ISA-201      | 1.6E+05       | 6.5E+05              | 1.6E+05                       | 5.4E+03              | 5.8E+05                 | 2.3E+05         | 5.9E+06       | 3.1E+05     | 1.4E+04       | 5.7E+05      |
| ASFV-BioMize      | 6.4E+04       | 4.1E+05              | 8.9E+04                       | 3.3E+04              | 3.7E+05                 | 4.4E+05         | 6.5E+06       | 4.9E+05     | 2.1E+04       | 5.8E+05      |
| Contact Spreaders | 1.9E+06       | 3.0E+06              | 1.8E+06                       | 6.3E+05              | 1.8E+06                 | 1.4E+06         | 1.7E+07       | 1.1E+06     | 1.1E+05       | 7.9E+06      |

**Supplementary Table 4. Terminal clinical scores.**

| Groups            | Pig ID | Adjuvant           | Terminal Clinical Score | Group Mean Clinical Score |
|-------------------|--------|--------------------|-------------------------|---------------------------|
| Contact Spreaders | 6908   | none               | 1                       | 3.6                       |
|                   | 6886   |                    | 6                       |                           |
|                   | 6915   |                    | 4                       |                           |
|                   | 6901   |                    | 4                       |                           |
|                   | 6887   |                    | 4                       |                           |
|                   | 6906   |                    | 4                       |                           |
|                   | 6912   |                    | 3                       |                           |
|                   | 6907   |                    | 3                       |                           |
| Luc-ISA-201       | 6894   | Montanide ISA-201™ | 1                       | 1.4                       |
|                   | 6909   |                    | 2                       |                           |
|                   | 6896   |                    | 1                       |                           |
|                   | 6897   |                    | 2                       |                           |
|                   | 6888   |                    | 1                       |                           |
| ASFV-No Adjuvant  | 6898   | No Adjuvant        | 9                       | 3.4                       |
|                   | 6903   |                    | 2                       |                           |
|                   | 6893   |                    | 3                       |                           |
|                   | 6892   |                    | 0                       |                           |
|                   | 6900   |                    | 3                       |                           |
| ASFV-ISA-201      | 6884   | Montanide ISA-201™ | 9                       | 3.2                       |
|                   | 6885   |                    | 1                       |                           |
|                   | 6883   |                    | 1                       |                           |
|                   | 6902   |                    | 2                       |                           |
|                   | 6910   |                    | 3                       |                           |
| ASFV-BioMize      | 6913   | BioMize®           | 5                       | 3.2                       |
|                   | 6891   |                    | 1                       |                           |
|                   | 6890   |                    | 2                       |                           |
|                   | 6899   |                    | 2                       |                           |
|                   | 6904   |                    | 6                       |                           |
